# Supplementary material for: Sea urchin nanostructured nickel cobaltite modified carbon cloth integrated wearable patches for the on-site detection of the immunosuppressant drug mycophenolate mofetil
Source: Royal Society of Chemistry journal article supplement (doi:10.1039/d4an00592a), 2024-01-01
Supplement: d4an00592a1.pdf [file d4an00592a1.pdf]

**Sea Urchin Nanostructured Nickel Cobaltite Modified Carbon Cloth integrated Wearable  
Patch for the on-site detection of Immunosuppressant Drug Mycophenolate Mofetil**

*K Niyas<sup>a,b</sup>, Bartholomew Richard<sup>b</sup>, Menon Ankitha<sup>b</sup>, P Abdul Rasheed<sup>\*,a,b</sup>*

<sup>a</sup>Department of Biological Sciences and Engineering, Indian Institute of Technology Palakkad,  
Palakkad, Kerala, India- 678557

<sup>b</sup>Department of Chemistry, Indian Institute of Technology Palakkad, Palakkad,  
Kerala, India- 678557

5 pages

2 calculations,

6 figures

## Supporting Information

The average crystallite size;

$$D = \frac{0.94\lambda}{\beta \cos\theta} \quad \text{equation 1}$$

$$\lambda = 0.154 \text{ nM}$$

$$\beta \text{ (FWHM) } (^{\circ}) = 0.99956$$

$$\text{Peak position } 2\theta (^{\circ}) = 36.64$$

$$D = (0.94 \times 0.154) / (0.99956 \times \cos(36.64/2))$$

$$D = 8.74080883 \text{ nM}$$

The limit of detection (LOD) was calculated using 3 sigma method

$$\text{LOD} = 3 \times \text{SD of blank} / \text{slope of the calibration curve}$$

$$\text{SD of blank} = 0.025051 \mu\text{A}$$

$$\text{Slope} = 0.0611$$

$$\text{SD of blank/slope of the calibration curve} = 0.41 \text{ nM}/\mu\text{A}$$

$$\text{LOD} = 1.23 \text{ nM}$$

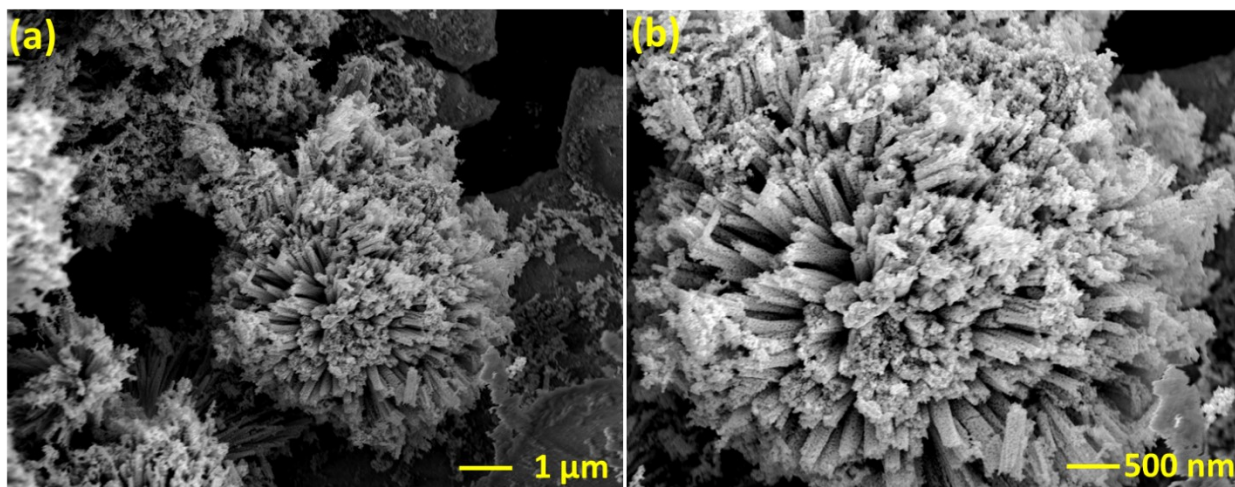

Fig. S1. SEM images of  $\text{NiCo}_2\text{O}_4$ -APTES at different magnifications.

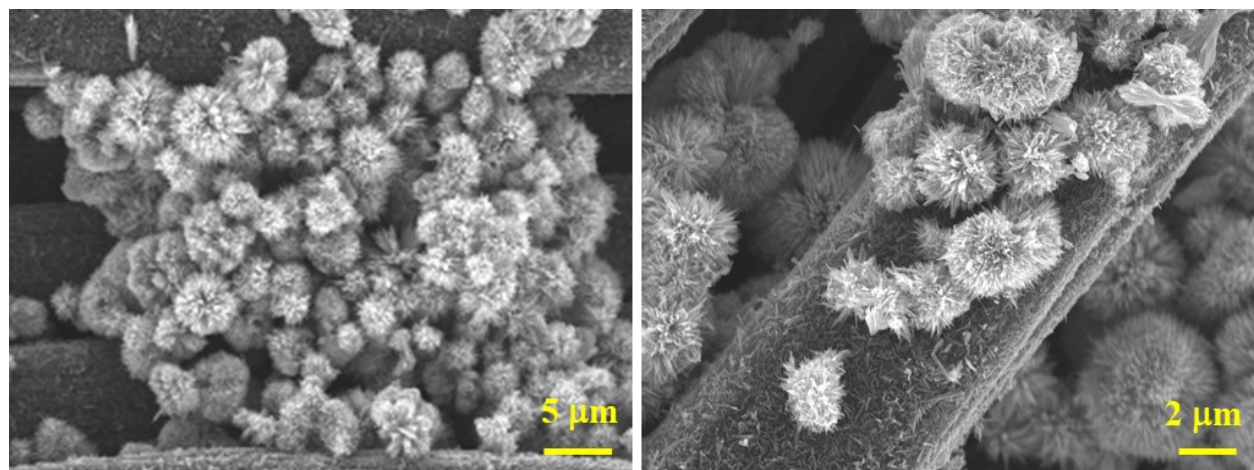

Fig. S2. SEM images of  $\text{NiCo}_2\text{O}_4$ -APTES on CC at different magnifications.

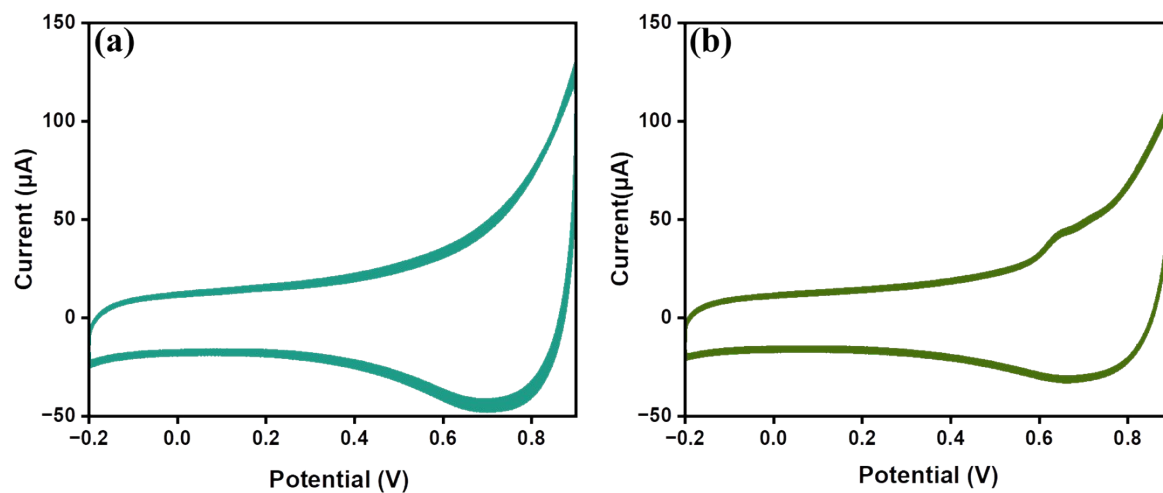

Fig. S3. (a) Cyclic stability of  $\text{NiCo}_2\text{O}_4$ -APTES in 0.1 M PBS for 10 cycles. (b) Cyclic stability of  $\text{NiCo}_2\text{O}_4$ -APTES in 0.1 M PBS containing 1  $\mu\text{M}$  MpM for 10 cycles.

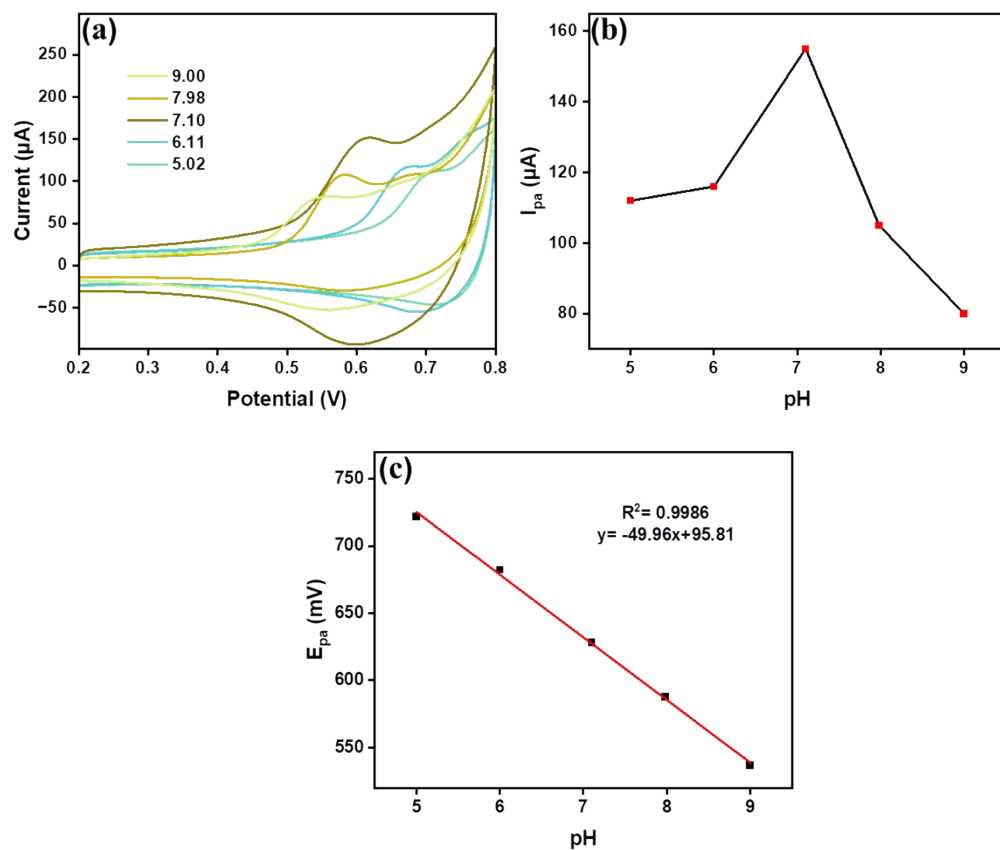

Fig. S4 (a) CV's obtained for 100  $\mu\text{M}$  MpM of varied pH (5.2, 6.5, 7.1, 8.3, 9.4) on  $\text{NiCo}_2\text{O}_4$ -APTES/CC at scan rate of  $100 \text{ mVs}^{-1}$ . (b) Relation between anodic peak current ( $I_{pa}$ ) vs pH. (c) The relation between anodic peak potential ( $E_{pa}$ ) and pH of the analyte solution.

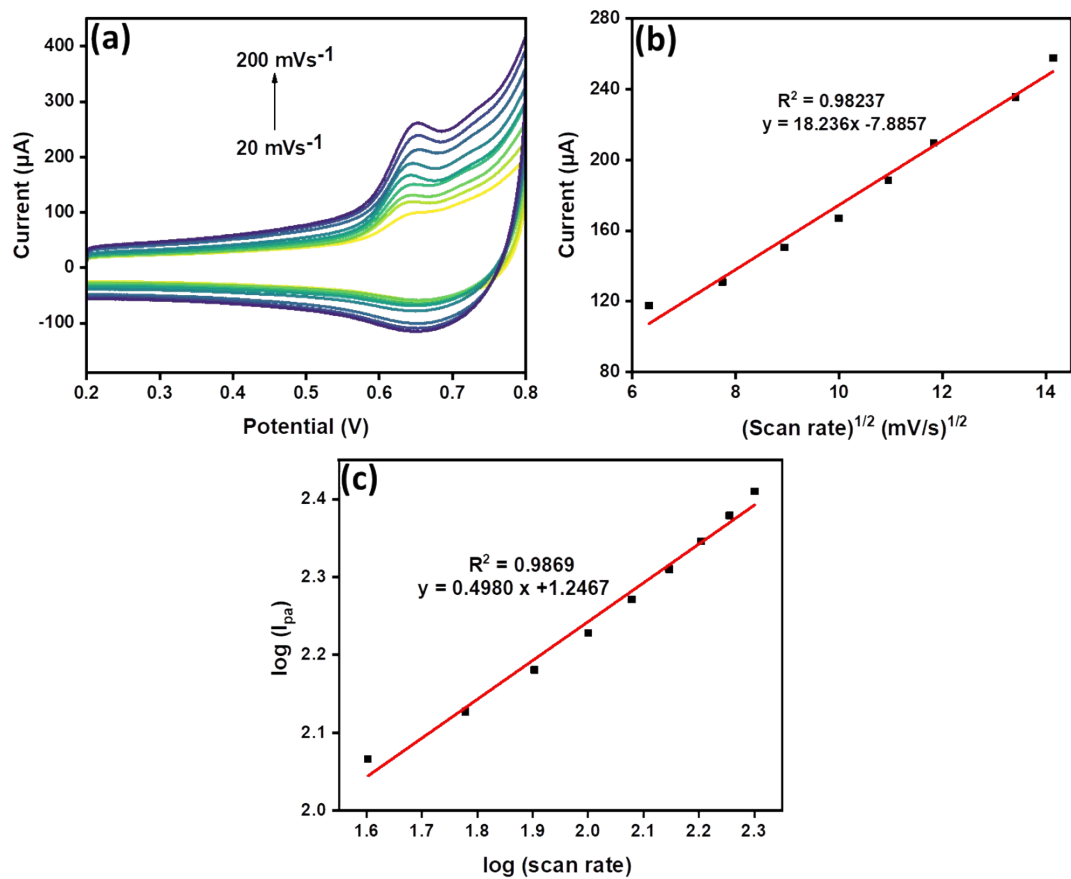

Fig. S5 (a) CV's of NiCo<sub>2</sub>O<sub>4</sub>-APTES/CC electrode at different scan rates varying from 20 to 200 mV/s.(b) Calibration plot of anodic peak current vs square root of scan rate. (c) Calibration plot of log anodic peak current vs log scan rate.

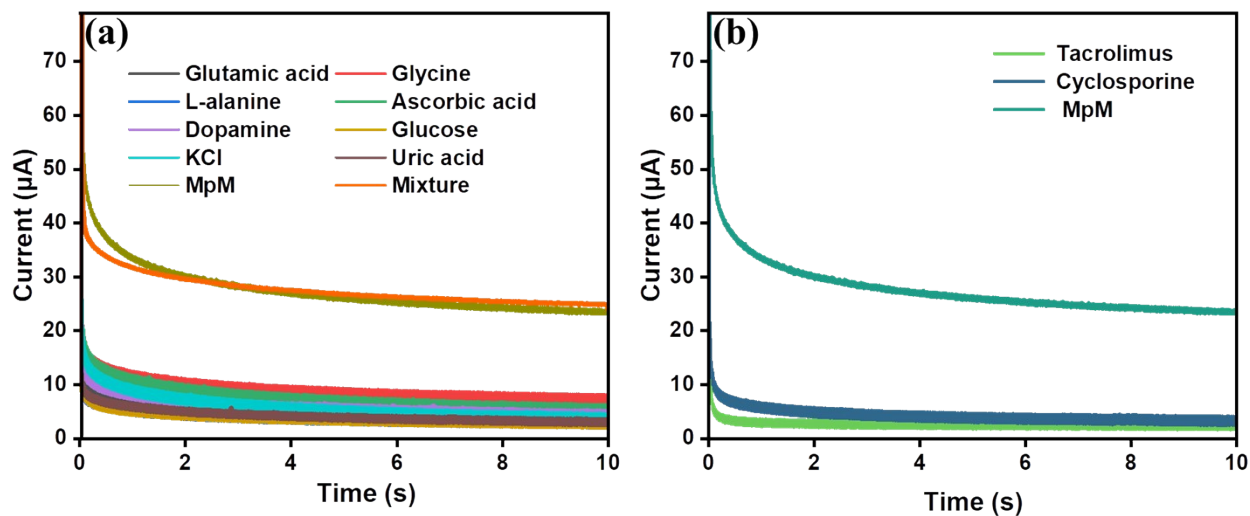

Fig. S6 (a) CA plot showing Selectivity of MpM in the presence of different interfering analytes GA, GLA, ALA, AA, DA, GLU, KCl, UA, and Mixture (b) Selectivity of MpM in the presence of Tacrolimus (Tac) and Cyclosporine in 10 times higher concentration than MpM.

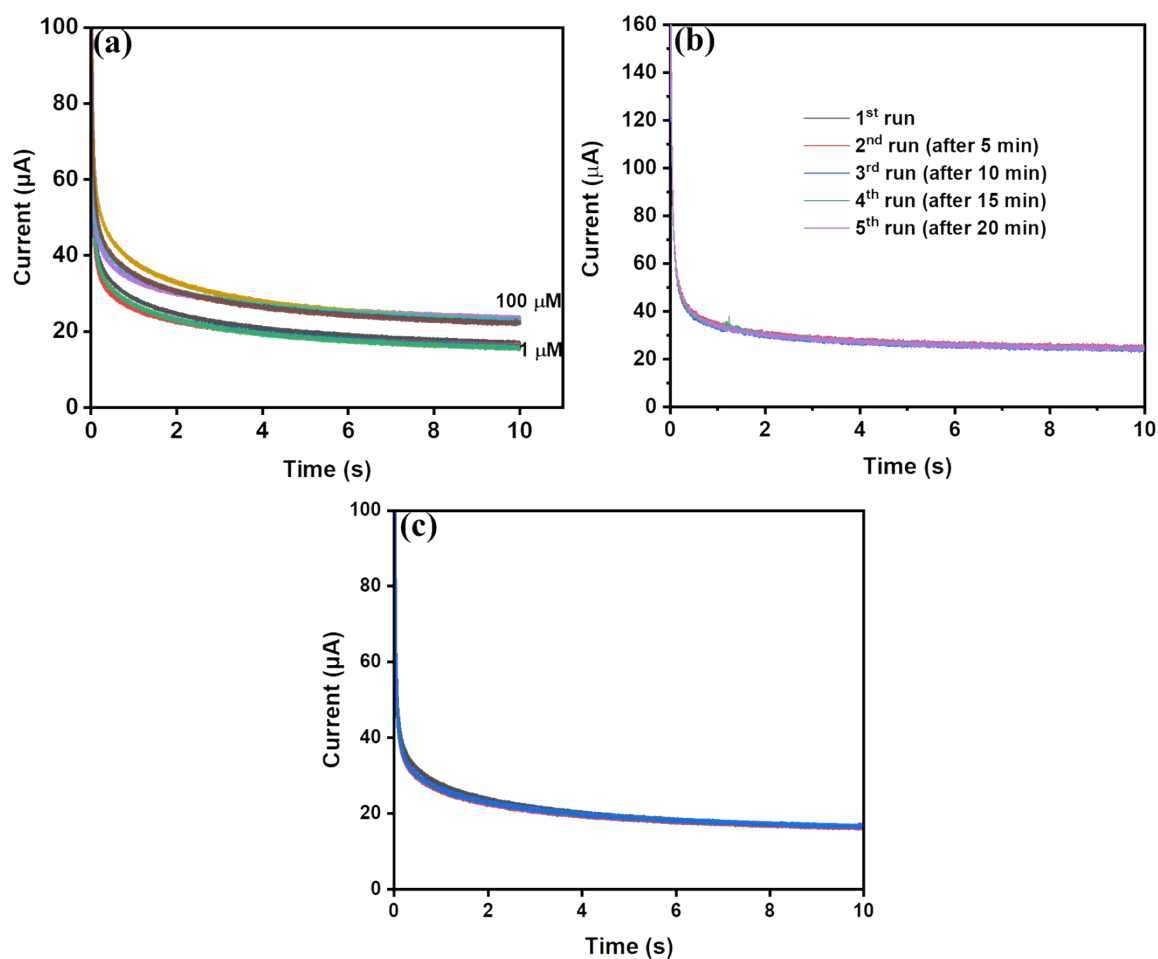

Fig. S7(a) CA curves showing the stability of different  $\text{NiCo}_2\text{O}_4$ -APTES/CC electrodes from 0 to 21 days in 1  $\mu\text{M}$  and 100  $\mu\text{M}$  of MpM in 0.1 M PBS solution. (b) CA plot showing repeatability of sensor which is carried out using same electrode consecutively for 5 times. (c) CA plot showing reproducibility of the sensor in 1  $\mu\text{M}$  of MpM carried out using different electrodes.
